# Supplementary material for: Direct NMR detection of the unstable “red product” from the reaction between nitroprusside and 2-mercaptosuccinic acid
Source: Royal Society of Chemistry journal article supplement (doi:10.1039/c5dt04029a), 2015-01-01
Supplement: c5dt04029a1.pdf [file c5dt04029a1.pdf]

## Direct NMR detection of the unstable “red product” from reaction between nitroprusside and mercaptosuccinic acid

Yin Gao, Brendan Mossing, and Gang Wu\*

Department of Chemistry, Queen’s University, Kingston, Ontario, Canada K7L 3N6

### 1. Synthetic details

*Materials.* Chemicals were purchased from Sigma-Aldrich unless stated otherwise. These materials were used as received without further purification. 2-mercaptosuccinic acid (MSA,  $\text{HOOCCH}(\text{SH})\text{CH}_2\text{COOH}$ ), sodium nitroprusside (SNP,  $\text{Na}_2[\text{Fe}^{\text{II}}(\text{CN})_5\text{NO}]\cdot 2\text{H}_2\text{O}$ ), sodium hydroxide (NaOH), sodium nitrite ( $\text{NaNO}_2$ ),  $^{15}\text{N}$ -labeled sodium nitrite ( $\text{Na}^{15}\text{NO}_2$ , 98%  $^{15}\text{N}$ ),  $^{17}\text{O}$ -labeled water ( $\text{H}_2^{17}\text{O}$ , 41.1%  $^{17}\text{O}$ , purchased from CortecNet), ethylenediaminetetraacetic acid (EDTA,  $\text{C}_{10}\text{H}_{16}\text{N}_2\text{O}_8$ ), sodium carbonate ( $\text{Na}_2\text{CO}_3$ ), sodium hydrogen carbonate ( $\text{NaHCO}_3$ ), sodium chloride (NaCl), potassium cyanide (KCN), and ion-exchange resin (Amberlite IR-120, strongly acidic form).

*Synthesis of  $^{15}\text{N}$ -labeled SNP.*  $\text{Na}_2[\text{Fe}(\text{CN})_5(^{15}\text{NO})]\cdot 2\text{H}_2\text{O}$  was prepared in aqueous solution by mixing commercial SNP (260 mg) with 1.1 molar equivalents of NaOH and 1.9 molar equivalents of  $\text{Na}^{15}\text{NO}_2$ . The reaction mixture was kept at room temperature for 10 min, following by addition of 285  $\mu\text{L}$  of 4 M acetic acid. The reaction mixture was concentrated to a paste on rotary evaporator. The residual material was dissolved in 2 mL of 4 M acetic acid and the solvent was evaporated on rotary evaporator. This process was repeated once. The residue was treated with 1,4-dioxane (4 mL); solid material was collected by filtration, washed with ethanol ( $2 \times 3$  mL), dried under vacuum, to give the title compound as red powder (153 mg, 59%). The  $^{15}\text{N}$  enrichment in the product was 60%.  $^{15}\text{N}$  NMR (50.6 MHz,  $\text{D}_2\text{O}$ ): 371 ppm (ref. to liquid  $\text{NH}_3$ );  $^{13}\text{C}$  NMR (125.6 MHz,  $\text{D}_2\text{O}$ ), 134.8 ppm (eq) and 132.8 ppm (ax).

*Synthesis of  $^{17}\text{O}$ -labeled SNP.*  $\text{Na}_2[\text{Fe}^{\text{II}}(\text{CN})_5(\text{N}^{17}\text{O})]\cdot 2\text{H}_2\text{O}$  was prepared by mixing 265 mg of commercial SNP and 35.6 mg of NaOH in 300  $\mu\text{L}$  of  $\text{H}_2^{17}\text{O}$  (41.1%  $^{17}\text{O}$ ). A few grains of Amberlite IR-120 (strongly acidic form) were gradually added to the reaction mixture and the progress of this reaction was monitored via  $^{17}\text{O}$  NMR spectroscopy. Upon reaching the equilibrium, the mixture was then treated with 1,4-dioxane (4 mL) and the precipitates were collected via filtration and dried under vacuum. The  $^{17}\text{O}$ -enrichment of the product was 20%.  $^{17}\text{O}$  NMR (67.7 MHz,  $\text{D}_2\text{O}$ ): 419 ppm (ref.

to water),  $^{13}\text{C}$  NMR (125.6 MHz,  $\text{D}_2\text{O}$ ): 134.8 ppm (eq) and 132.8 ppm (ax).

*Synthesis of  $^{17}\text{O}$ -labeled  $\text{NaN}^{17}\text{O}_2$ .*  $\text{NaNO}_2$  (0.8 g) and a few grains of Amberlite IR-120 (strongly acidic form) were placed in a round-bottom flask, to which  $\text{H}_2^{17}\text{O}$  (41.1%, 1 mL) was subsequently added. A cap was immediately placed on the flask, which was then sealed with parafilm. The mixture was stirred slowly for 20 min until a clear solution was obtained and this solution was kept at room temperature overnight. This solution was then heated at 75 °C for 2 h. The solution was subsequently lyophilized. The  $^{17}\text{O}$ -enrichment of the product was 18%.  $^{17}\text{O}$  NMR (67.7 MHz,  $\text{D}_2\text{O}$ ): 661 ppm (ref. to water).

*Synthesis of  $[\text{Fe}^{\text{II}}(\text{CN})_5\text{N}(\text{O})\text{SR}]^{3-}$ .* A 200 mM MSA in  $\text{D}_2\text{O}$  buffer solution (0.05 M sodium carbonate, 0.1 M NaCl, 0.5 mM EDTA and 12 mM KCN; pH 11) was added to SNP (1 molar equivalents). In solution the complex exhibits a characteristic absorption band at  $\lambda_{\text{max}} = 526$  nm in its UV/Vis spectrum. The corresponding  $^{15}\text{N}$ - and  $^{17}\text{O}$ -labeled complexes were prepared in the same fashion, except that  $^{15}\text{N}$ - and  $^{17}\text{O}$ -labeled SNPs were used. All solutions were freshly prepared.

## 2. NMR data analysis

The 2D  $^1\text{H}$ - $^1\text{H}$  EXSY (NOESY) spectra of the MSA-SNP reaction mixture were analyzed with ExsyCalc (Mestrelab Research). At each temperature, two 2D spectra were recorded mixing times of 4 and 10 ms. The integrations of the cross and diagonal peaks were then used to determine the exchange rates ( $k_{\text{d}}$  and  $k_{\text{f}}$ ) between the RP and MSA free ligand.

**Table S1.** Experimental equilibrium constants ( $K_{\text{eq}}$ )<sup>a</sup> and ligand exchange rates ( $k_{\text{d}}$  and  $k_{\text{f}}$ ) of the reaction between NP and MSA at different temperatures from 1D  $^1\text{H}$  NMR and 2D EXSY NMR spectra. The initial concentration was 50 mM for NP and MSA.

| Temperature (K) | [RP]/[MSA] | $K_{\text{eq}}$ | $k_{\text{d}}$ ( $\text{s}^{-1}$ ) | $k_{\text{f}}$ ( $\text{s}^{-1}$ ) |
|-----------------|------------|-----------------|------------------------------------|------------------------------------|
| 278             | 1 : 0.21   | 548.8           | 49.1                               | 7.3                                |
| 283             | 1 : 0.21   | 548.8           | 67.1                               | 11.8                               |
| 288             | 1 : 0.34   | 231.8           | 86.6                               | 20.2                               |
| 293             | 1 : 0.46   | 138.0           |                                    |                                    |
| 298             | 1 : 0.54   | 105.6           | 113.2                              | 62.0                               |
| 303             | 1 : 0.94   | 43.9            |                                    |                                    |
| 308             | 1 : 1.19   | 30.9            |                                    |                                    |
| 313             | 1 : 4.20   | 5.9             |                                    |                                    |

<sup>a</sup> $K_{\text{eq}} = [\text{RP}]/([\text{NP}][\text{MSA}])$ .

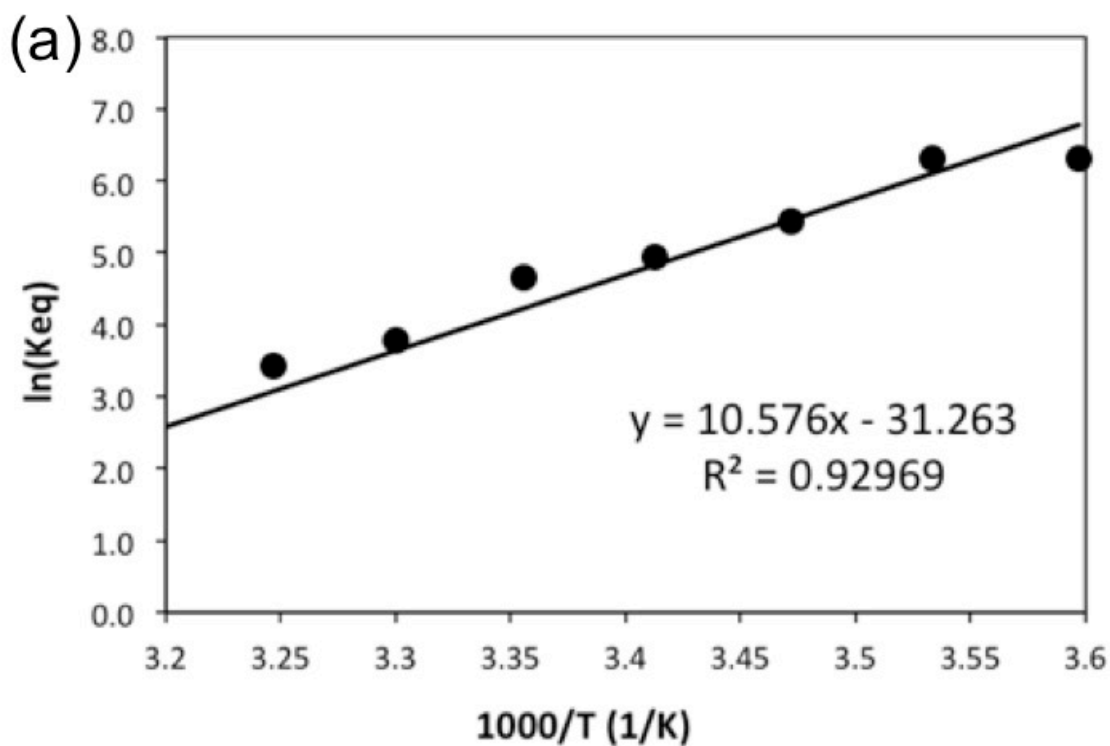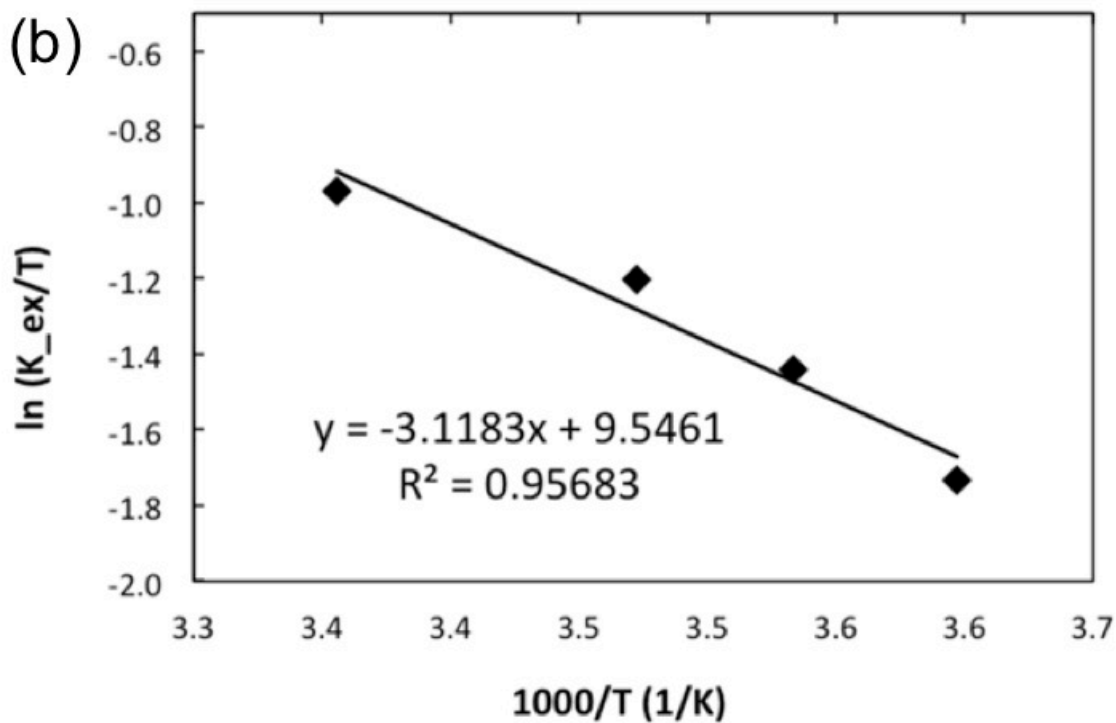

**Figure S1.** (a) Arrhenius plot of the experimental thermodynamic data and (b) Eyring plot of the experimental kinetic data. All data are given in Table S1.

**Table S2.** Summary of  $^{13}\text{C}$  chemical shifts (in ppm) observed for NP, RP, RSNO, and RSSR.

| Carbon                | NP    | RP    | RSNO  | RSSR <sup>a</sup> |
|-----------------------|-------|-------|-------|-------------------|
| C1 (COOH)             | —     | 179.4 | 176.7 | 179.4             |
| C2 (CH)               | —     | 55.1  | 46.4  | 53.8, 53.5        |
| C3 (CH <sub>2</sub> ) | —     | 37.8  | 37.2  | 40.6, 40.5        |
| C4 (COOH)             | —     | 176.7 | 175.8 | 178.7             |
| CN <sub>eq</sub>      | 134.8 | 167.6 | —     | —                 |
| CN <sub>ax</sub>      | 132.8 | 162.8 | —     | —                 |

<sup>a</sup>Spectra were recorded in reaction buffer (0.05 M sodium carbonate, 0.1 M NaCl, 0.5 mM EDTA and 12 mM KCN; pH 11).

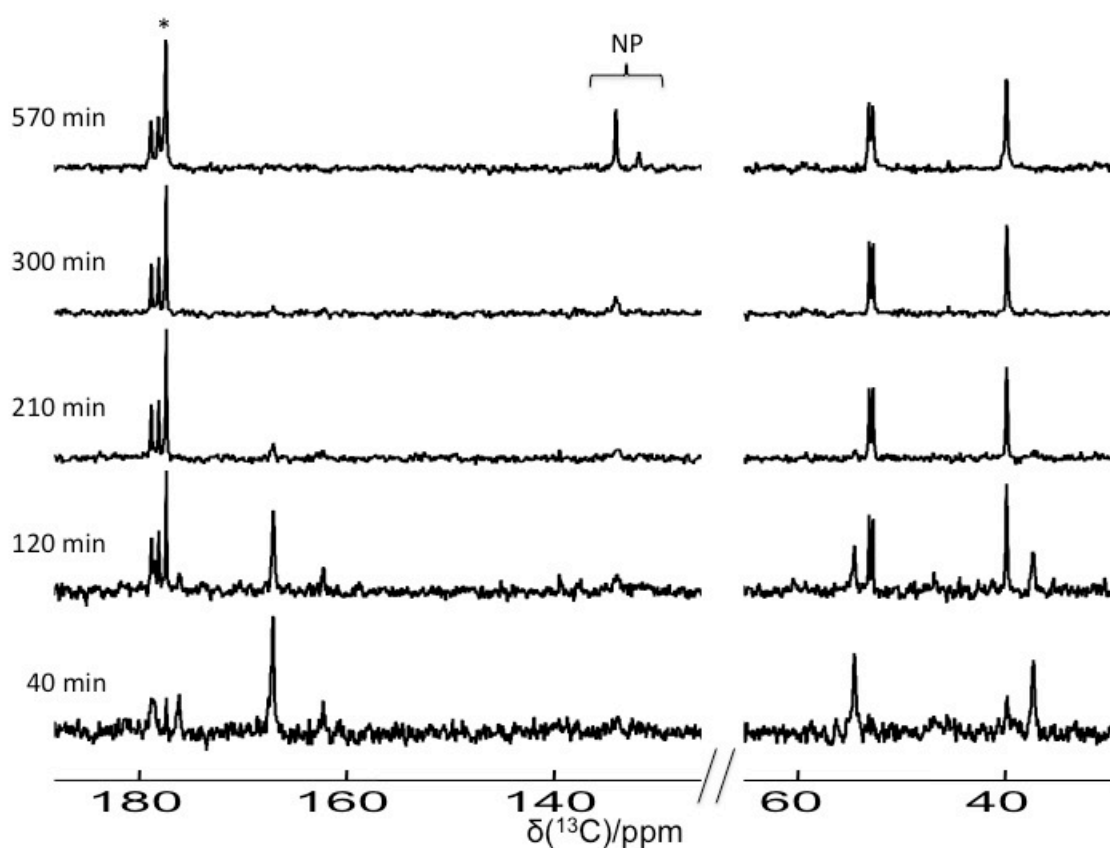

**Figure S2.** Decomposition of RP to RSSR monitored by  $^{13}\text{C}$  NMR. Note that the slow regeneration of NP was due to the oxidation of paramagnetic  $[\text{Fe}(\text{CN})_5\text{NO}]^{3-}$  (so invisible in the NMR spectra) by  $\text{O}_2$ . The signal marked by \* is due to  $[\text{Fe}(\text{CN})_6]^{4-}$ .
